# Supplementary material
Source: HighWire-hosted journal article supplement (https://www.cmajopen.ca/highwire/filestream/86749/field_highwire_adjunct_files/0/2020-0205-1-at.pdf)
Supplement: 2020-0205-1-at.pdf [file 2020-0205-1-at.pdf]

---

## Participant Information

---

Record ID

\_\_\_\_\_

---

### Participant Information

---

First Name:

\_\_\_\_\_

Last Name:

\_\_\_\_\_

Middle Initial (if applicable):

\_\_\_\_\_

Date of Birth:

\_\_\_\_\_

Gender:

- Female
- Male

What is your highest level of education?

- Some Highschool or less
- Highschool Diploma
- Some College or University
- University or College Degree

Postal Code:

\_\_\_\_\_

Do you live alone?

- Yes
- No

Marital Status:

- Married
- Living common-law
- Widowed
- Separated
- Divorced
- Single, never married

Ethnicity of Mother:

- White
- Aboriginal
- Black (Afro-Caribbean)
- East Asian (Chinese, Vietnamese, Filipino, Korean, etc)
- South Asian (East Indian, Pakistani, Sri Lankan, etc)
- Other (Latin American, Arab, West Asian)

Ethnicity of Father:

- White
  - Aboriginal
  - Black (Afro-Caribbean)
  - East Asian (Chinese, Vietnamese, Filipino, Korean, etc)
  - South Asian (East Indian, Pakistani, Sri Lankan, etc)
  - Other (Latin American, Arab, West Asian)
-

## Health-Related Questions

In general, would you say your health is:

- Excellent
- Very Good
- Good
- Fair
- Poor

|                                                                                                                             | Yes                   | No                    | Not Sure              |
|-----------------------------------------------------------------------------------------------------------------------------|-----------------------|-----------------------|-----------------------|
| Have you ever had a transient ischemic attack (TIA or mini-stroke)?                                                         | <input type="radio"/> | <input type="radio"/> | <input type="radio"/> |
| Have you ever had a stroke?                                                                                                 | <input type="radio"/> | <input type="radio"/> | <input type="radio"/> |
| Have you ever had heart attack?                                                                                             | <input type="radio"/> | <input type="radio"/> | <input type="radio"/> |
| Has your doctor told you that your cholesterol is high?                                                                     | <input type="radio"/> | <input type="radio"/> | <input type="radio"/> |
| Has your doctor told you that you have diabetes?                                                                            | <input type="radio"/> | <input type="radio"/> | <input type="radio"/> |
| Have you ever been told by a nurse or doctor that you have high blood pressure OR have you ever taken blood pressure pills? | <input type="radio"/> | <input type="radio"/> | <input type="radio"/> |

---

## Smoking and Alcohol

---

Do you currently smoke?  Yes  
 Not anymore  
 Never smoked

---

How many alcoholic drinks do you consume in an average week? Check the best answer.  Non-drinker/Rarely/Have stopped drinking  
 1-5  
 6-10  
 11-15  
 More than 15

---

## Diet and Physical Activity

---

Do you usually do some physical activity such as brisk walking for at least 30 minutes everyday? This activity can be done at work or at home.  Yes  
 No

---

Height \_\_\_\_\_ inches \_\_\_\_\_ cms  
Weight \_\_\_\_\_ lbs \_\_\_\_\_ kgs

---

## Social Isolation

---

How often do you feel that you lack companionship?  Hardly ever  
 Some of the time  
 Often

---

How often do you feel left out?  Hardly ever  
 Some of the time  
 Often

---

How often do you feel isolated from others?  Hardly ever  
 Some of the time  
 Often

---

## Income Security

---

Do you ever have trouble making ends meet at the end of the month?  Yes  
 No

---

## Health Related Quality of Life

---

1. Mobility  I have no problems in walking about  
 I have slight problems in walking about  
 I have moderate problems in walking about  
 I have severe problems in walking about  
 I am unable to walk about

---

2. Self-Care  I have no problems washing or dressing myself  
 I have slight problems washing or dressing myself  
 I have moderate problems washing or dressing myself  
 I have severe problems washing or dressing myself  
 I am unable to wash or dress myself

---

3. Usual Activities (e.g., work, study, housework, family or leisure activities)

- I have no problems doing my usual activities
- I have slight problems doing my usual activities
- I have moderate problems doing my usual activities
- I have severe problems doing my usual activities
- I am unable to do my usual activities

---

4. Pain/Discomfort

- I have no pain or discomfort
- I have slight pain or discomfort
- I have moderate pain or discomfort
- I have severe pain or discomfort
- I have extreme pain or discomfort

---

5. Anxiety/Depression

- I am not anxious or depressed
  - I am slightly anxious or depressed
  - I am moderately anxious or depressed
  - I am severely anxious or depressed
  - I am extremely anxious or depressed
-
